# Supplementary figures and images for: The impact of bilayer composition on the dimerization properties of the Slg1 stress sensor TMD from a multiscale analysis
Source: Royal Society of Chemistry journal article supplement (doi:10.1039/d2cp03497b), 2022-12-13

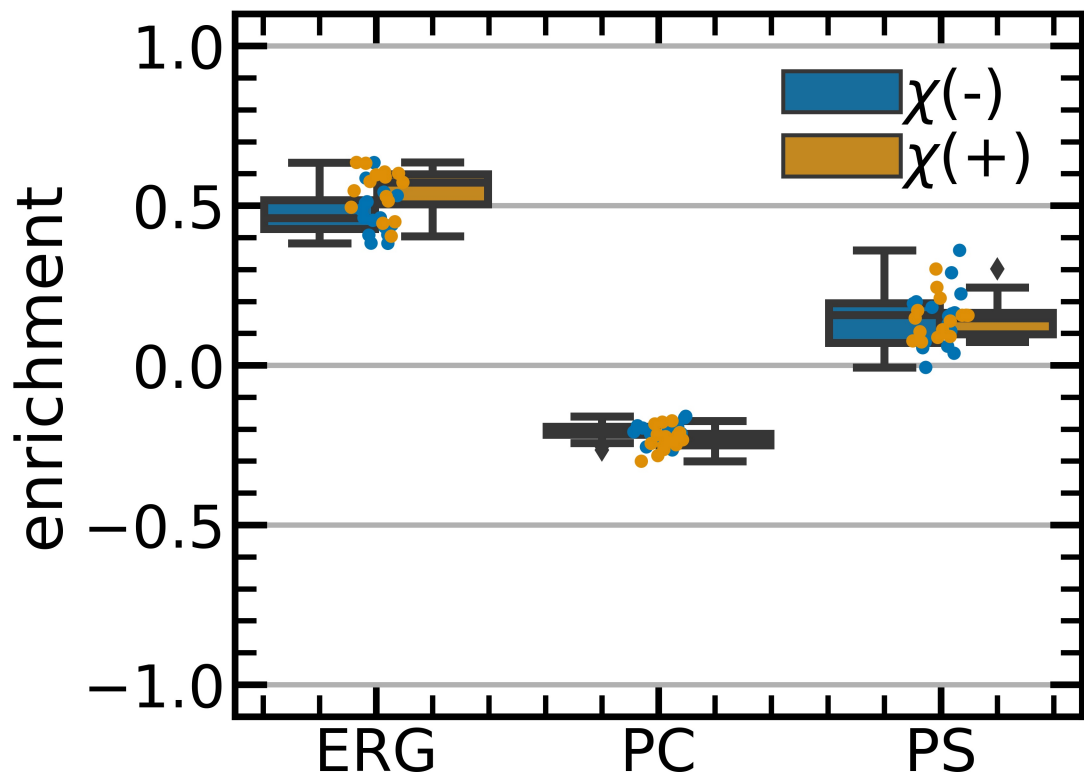

Supplement: d2cp03497b1.zip [file d2cp03497b1.zip]

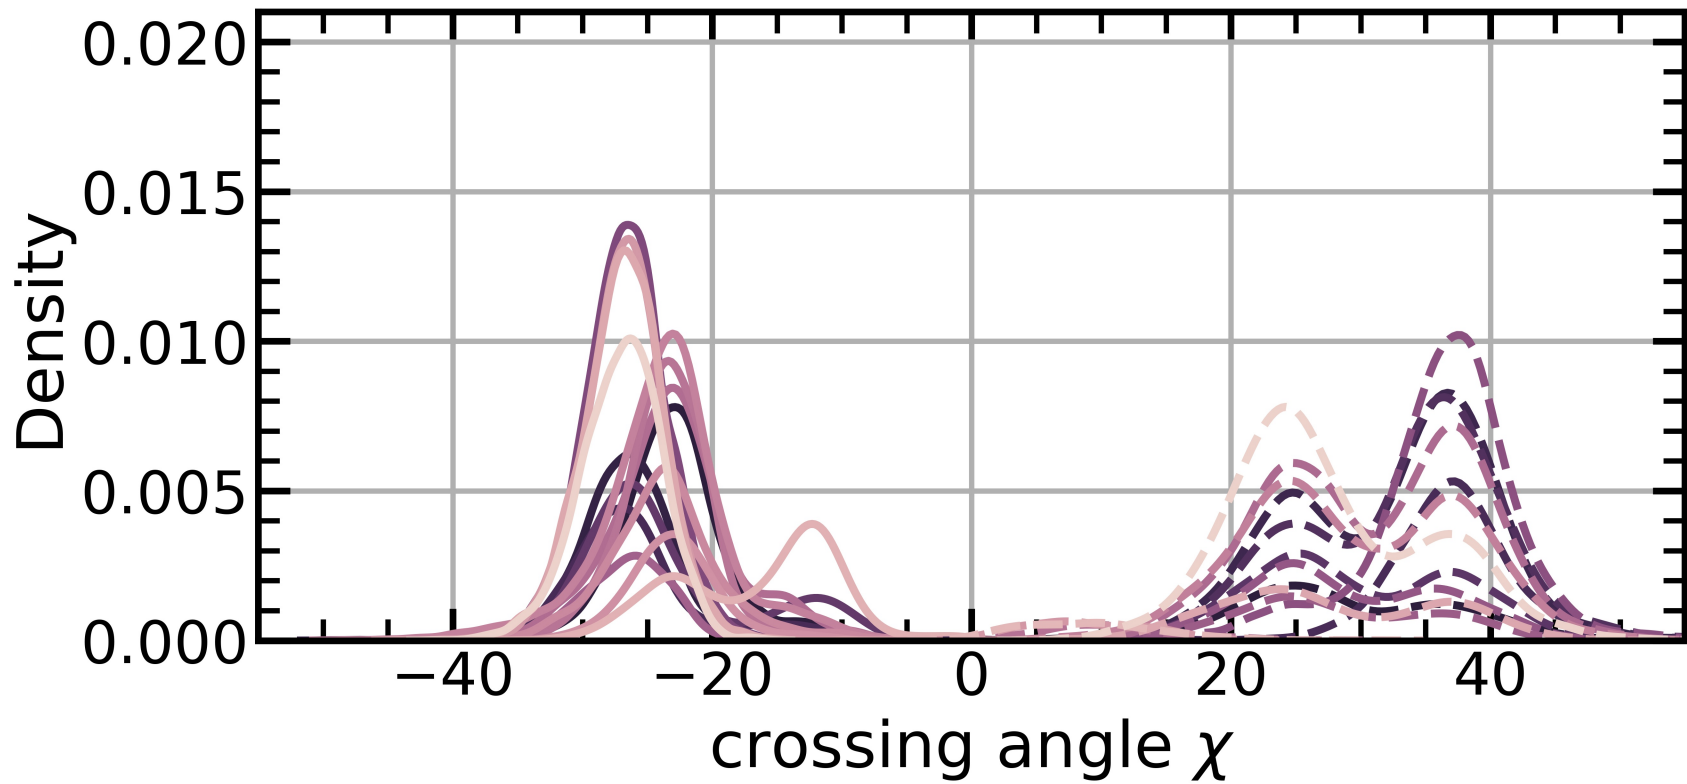

Supplement: d2cp03497b1.zip [file d2cp03497b1.zip]

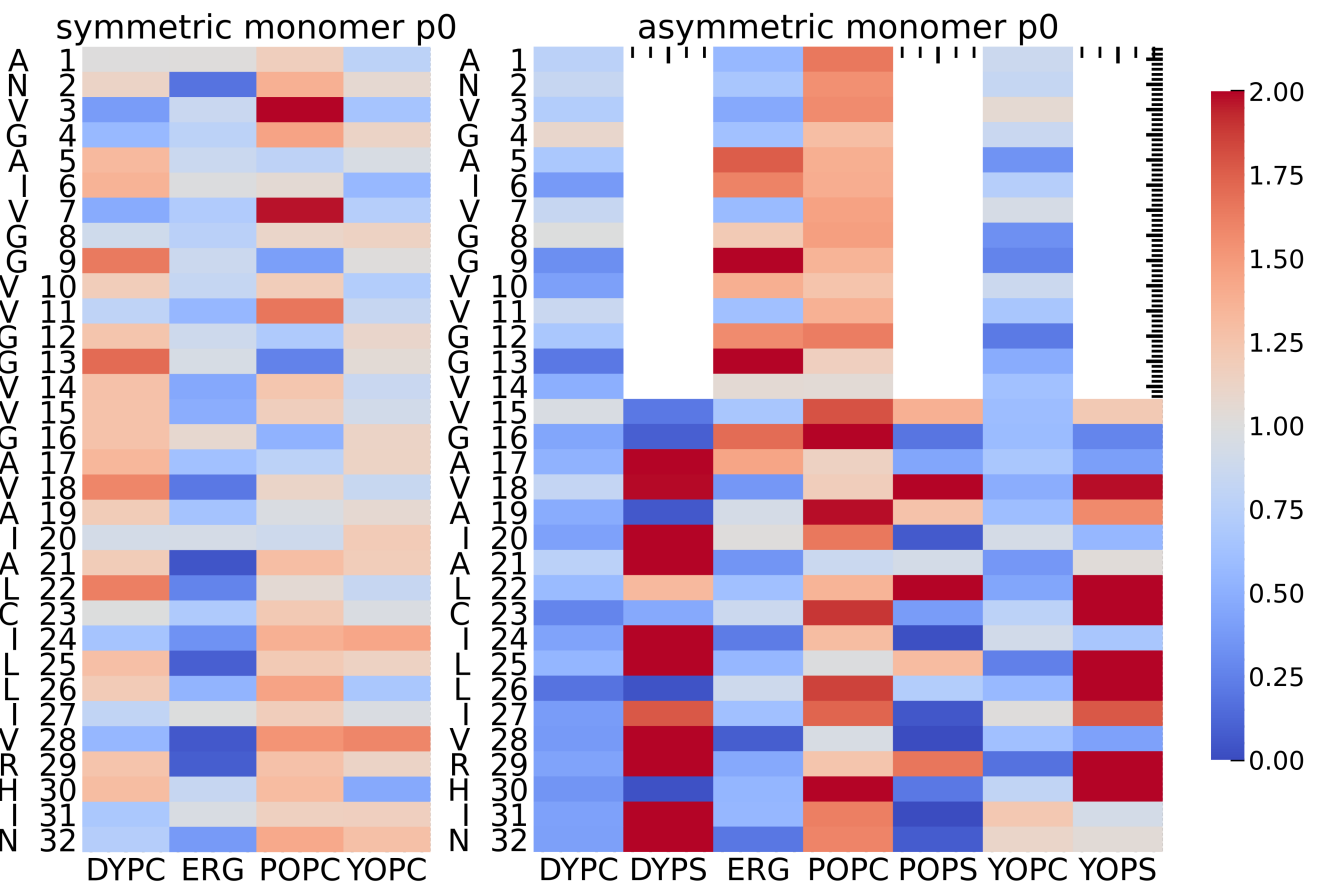

Supplement: d2cp03497b1.zip [file d2cp03497b1.zip]

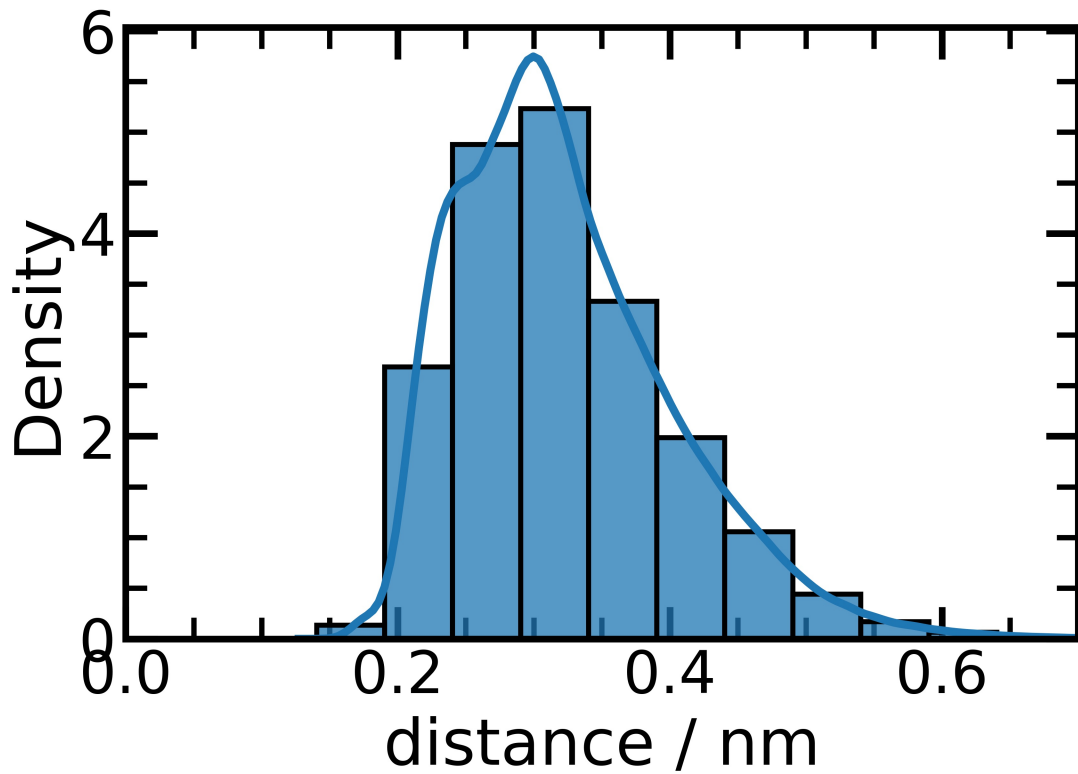

Supplement: d2cp03497b1.zip [file d2cp03497b1.zip]

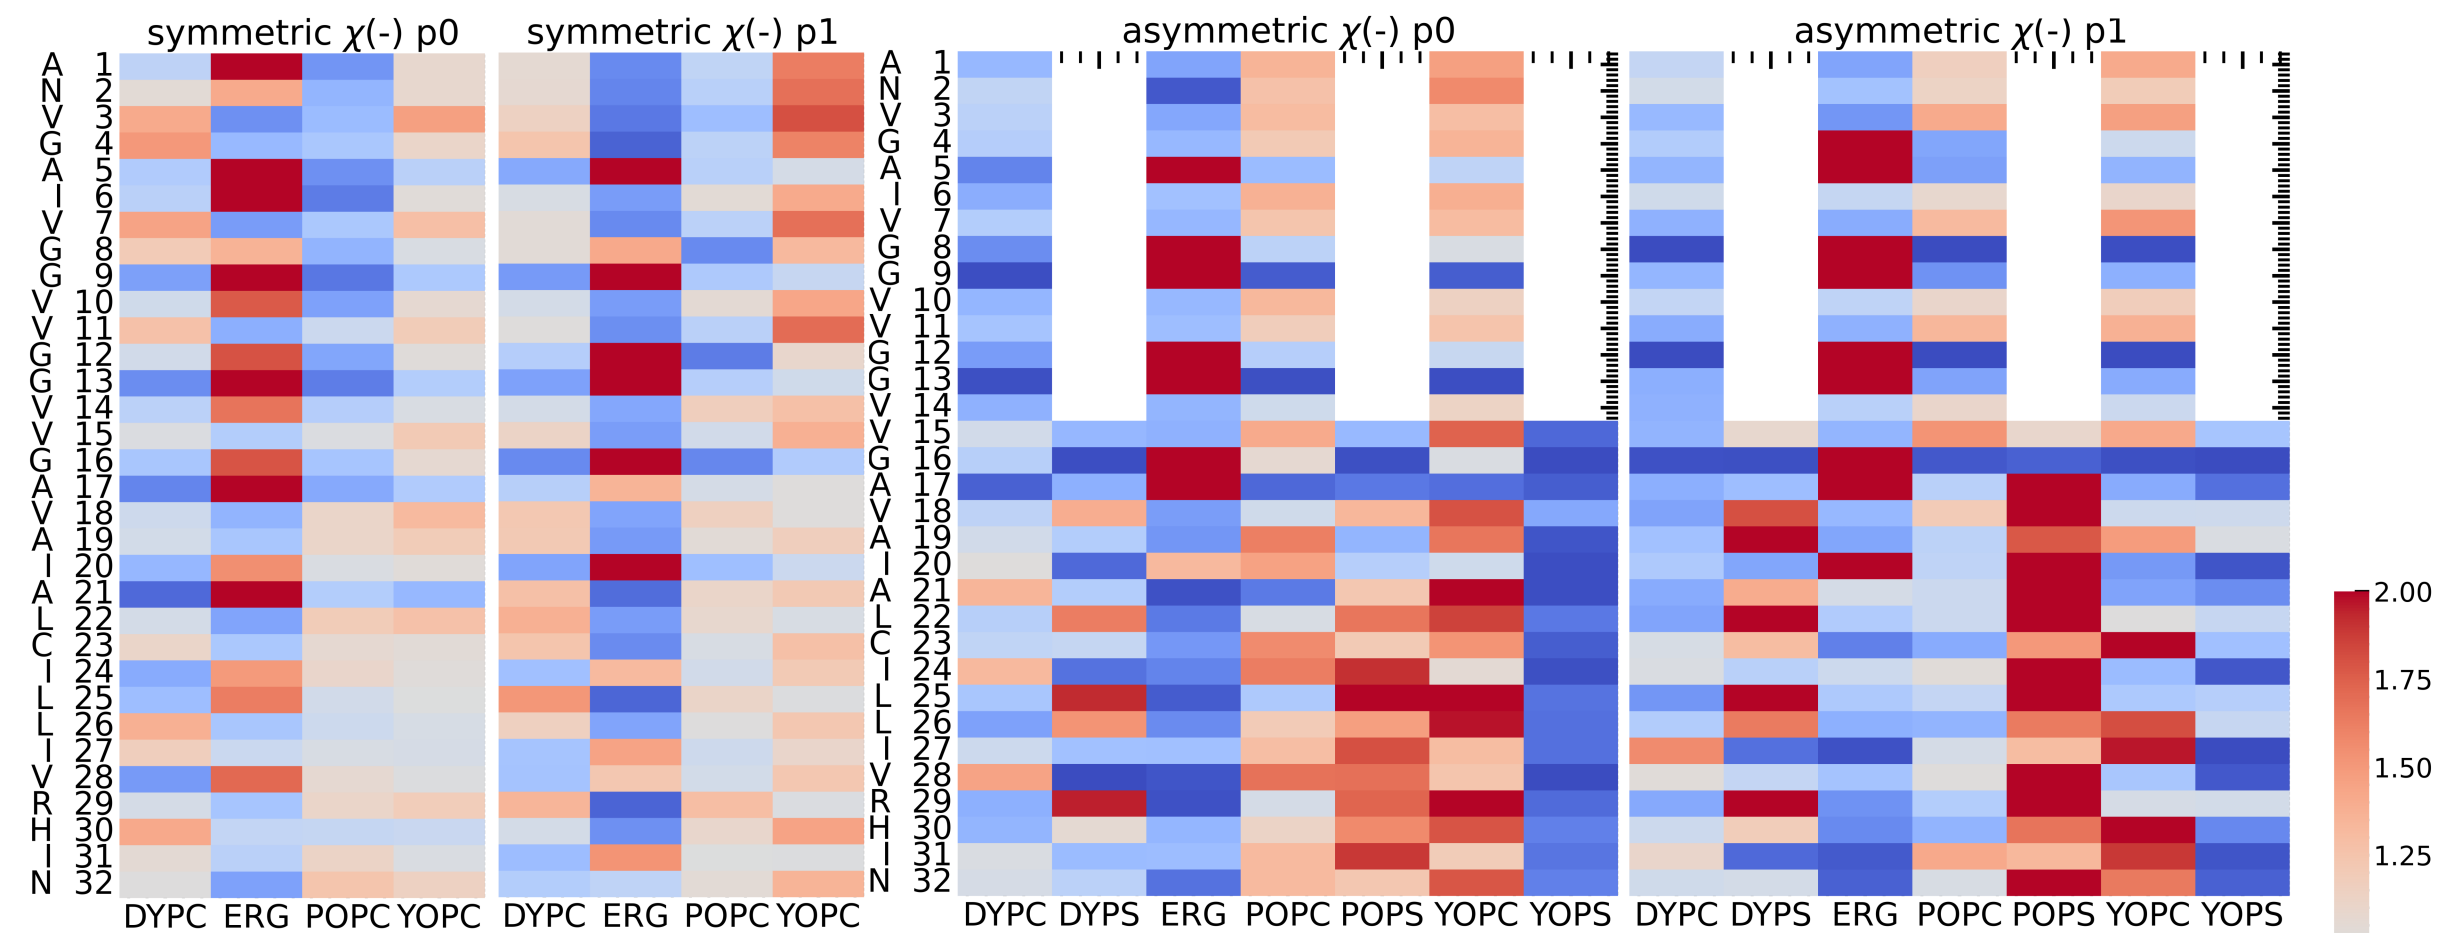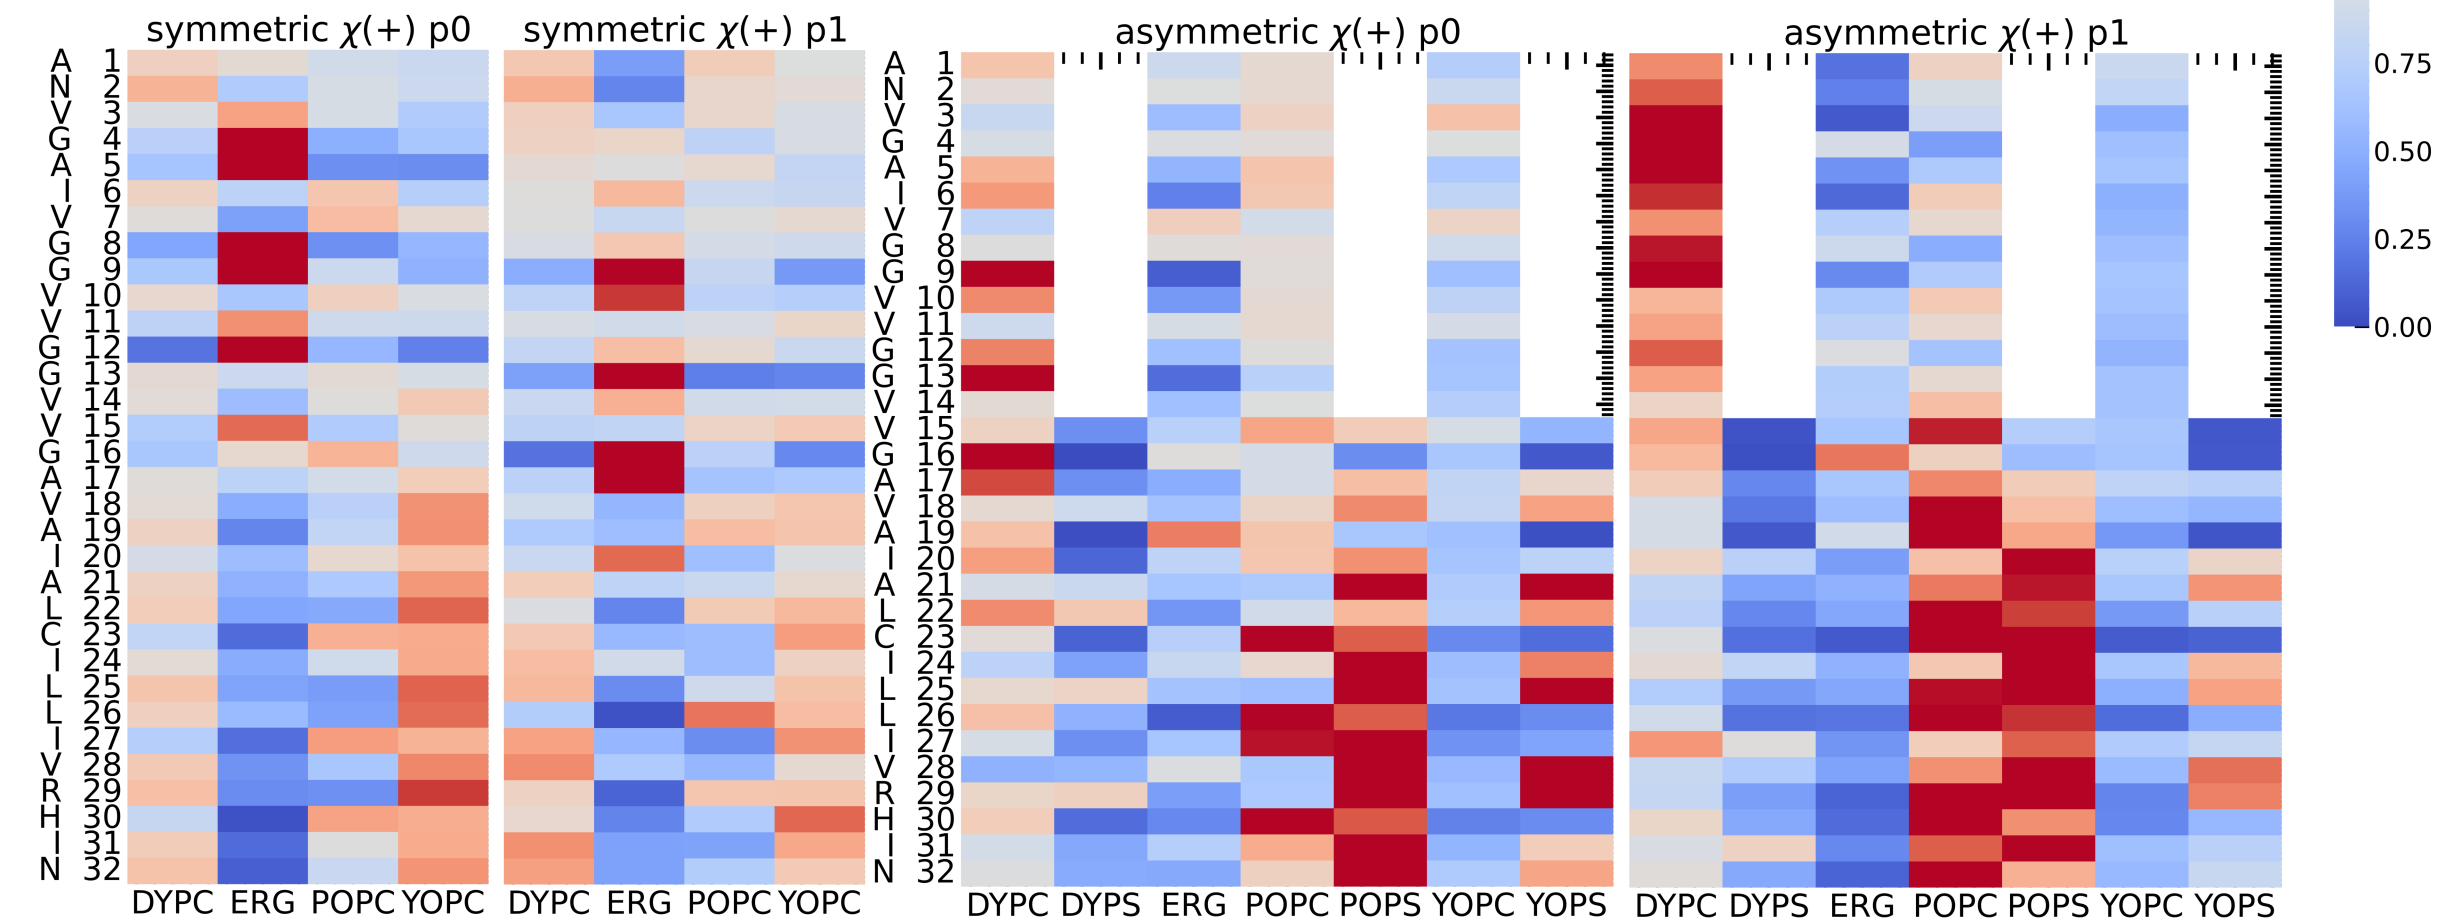

Supplement: d2cp03497b1.zip [file d2cp03497b1.zip]

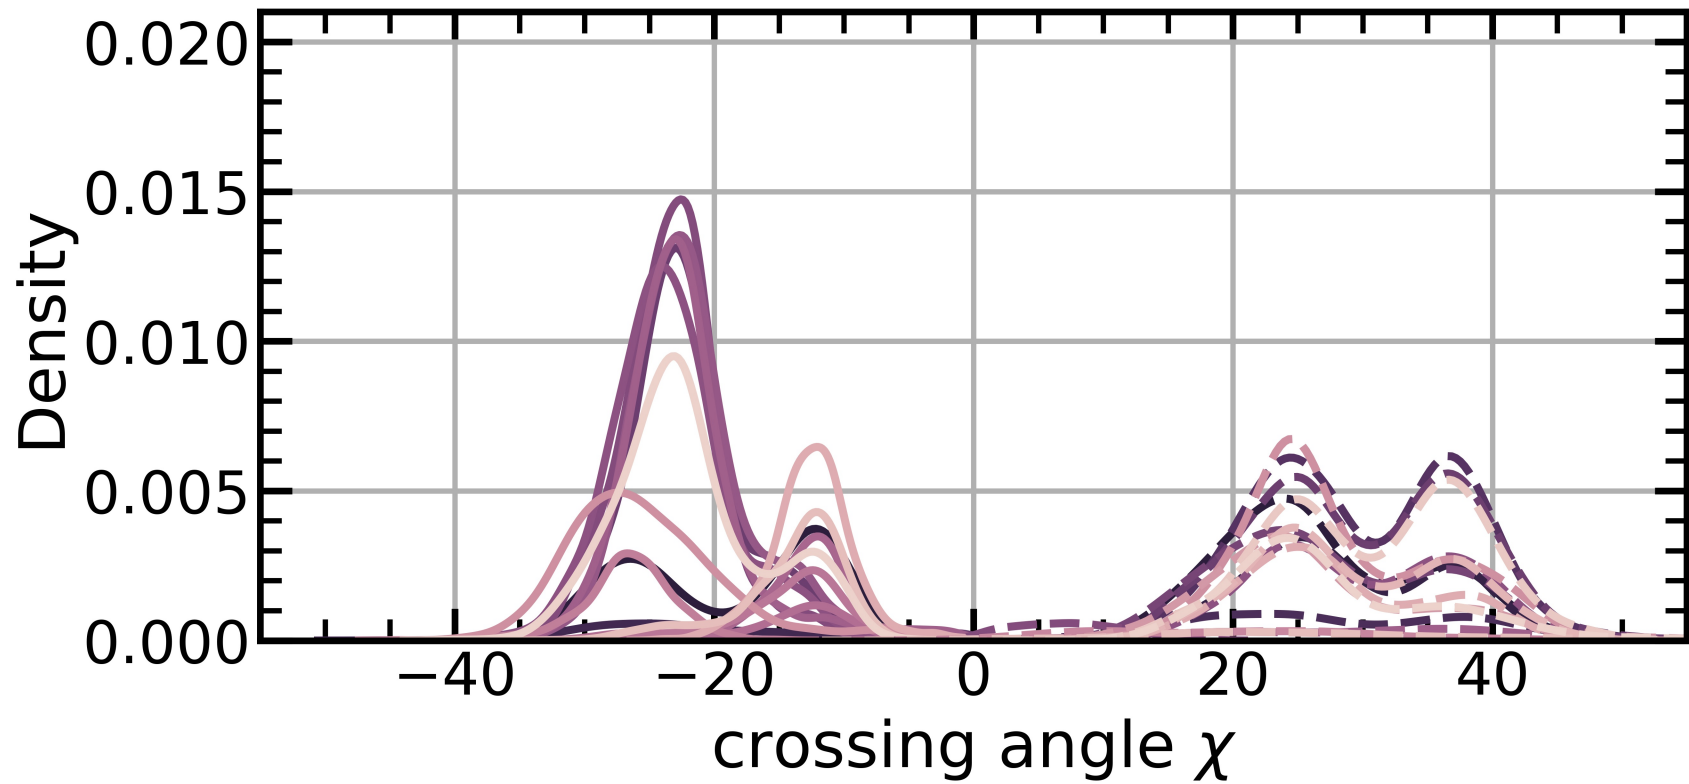

Supplement: d2cp03497b1.zip [file d2cp03497b1.zip]

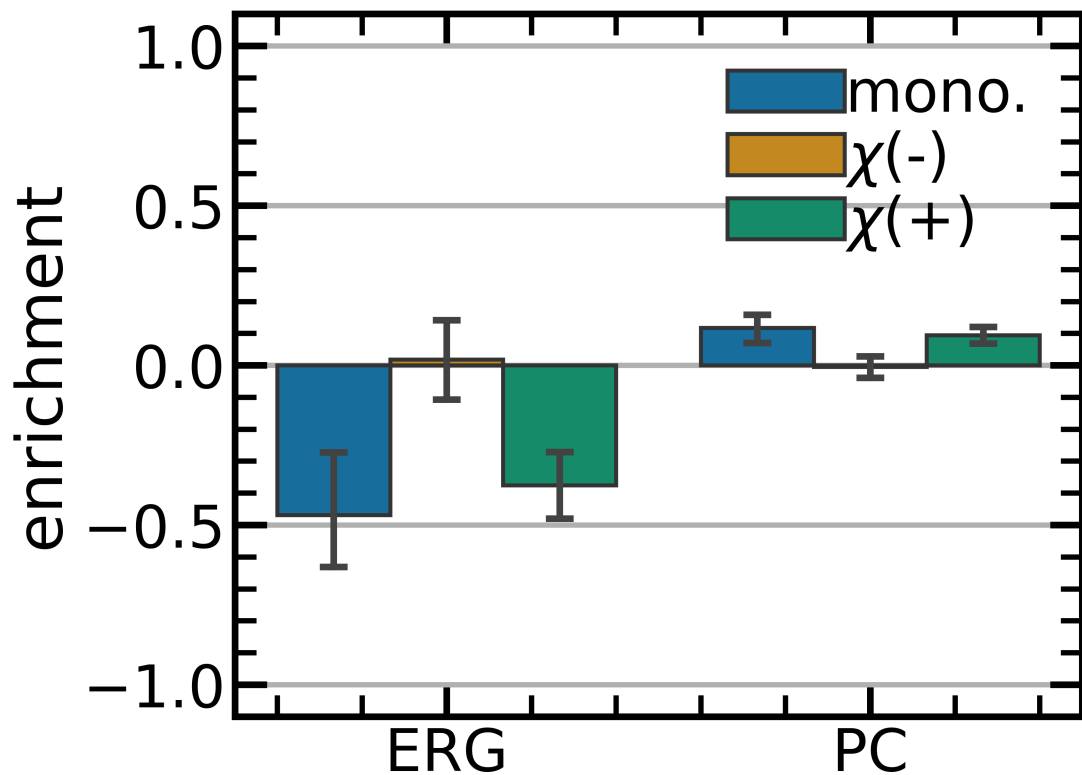

Supplement: d2cp03497b1.zip [file d2cp03497b1.zip]

ERG

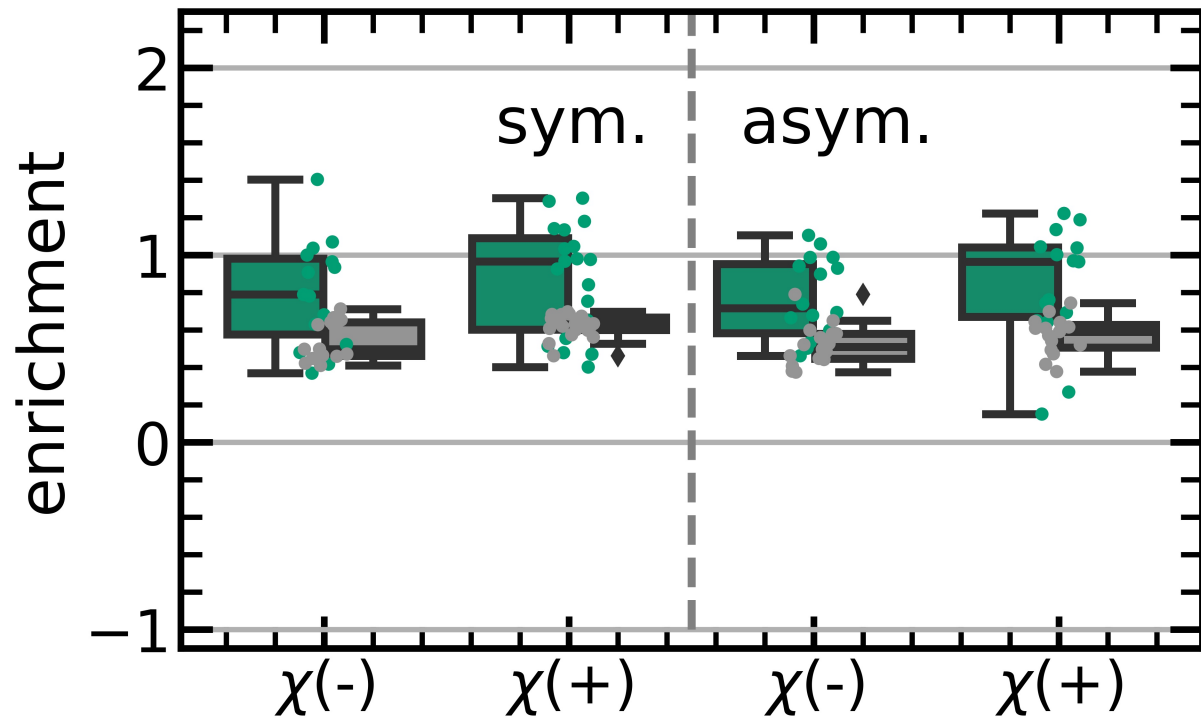

PC

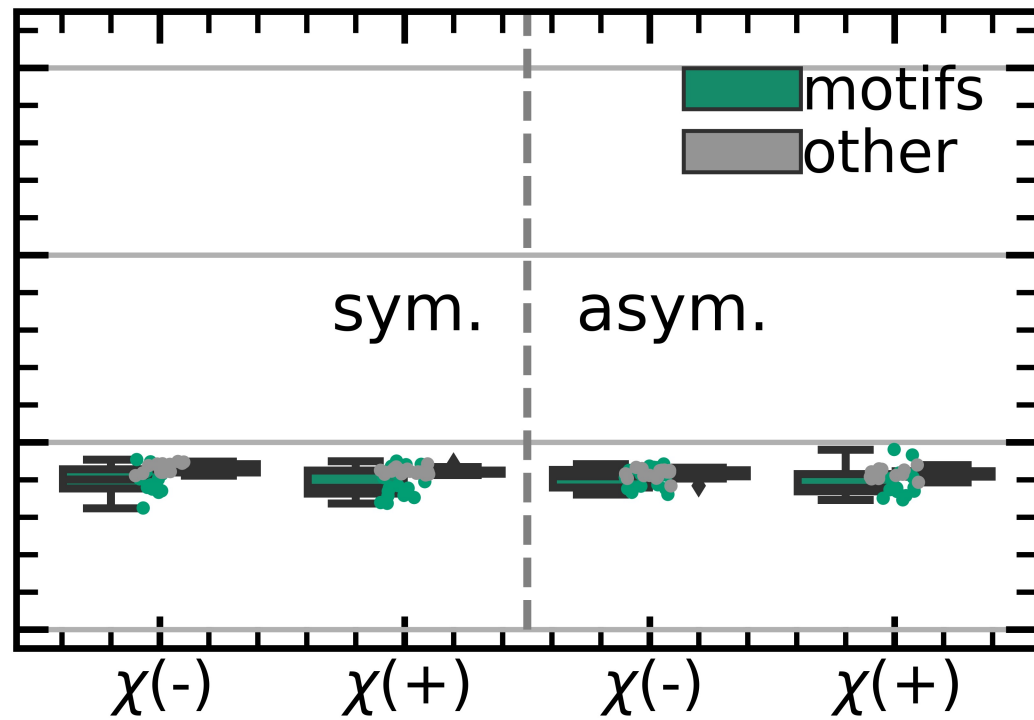

Supplement: d2cp03497b1.zip [file d2cp03497b1.zip]

symmetric

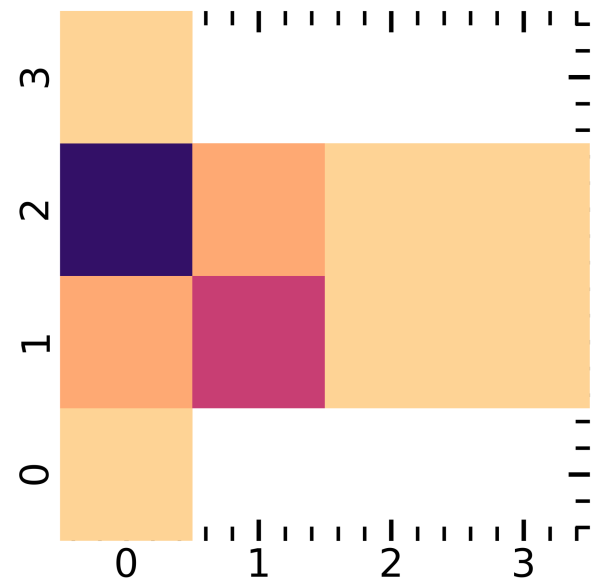

asymmetric

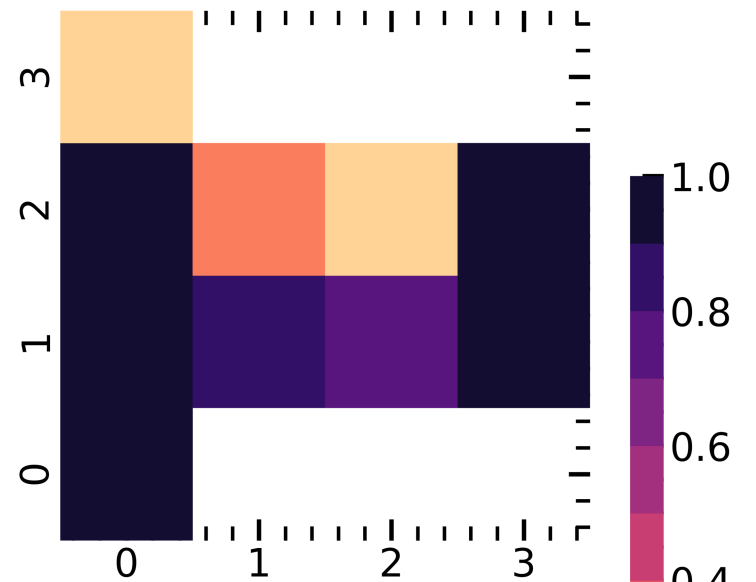 $\chi(-)$ 

symmetric

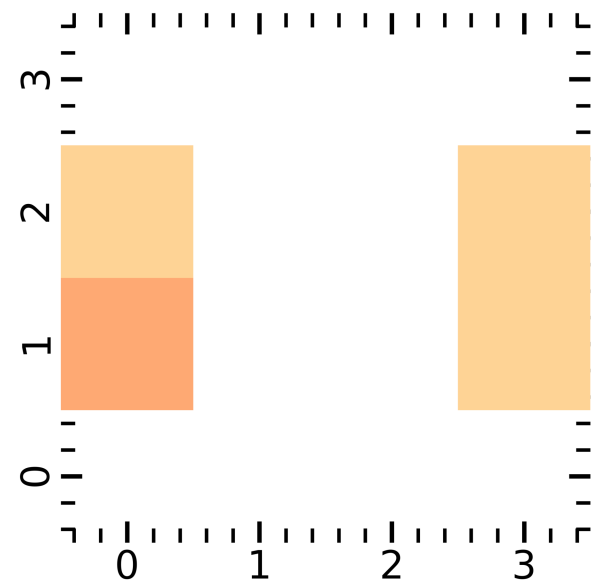

asymmetric

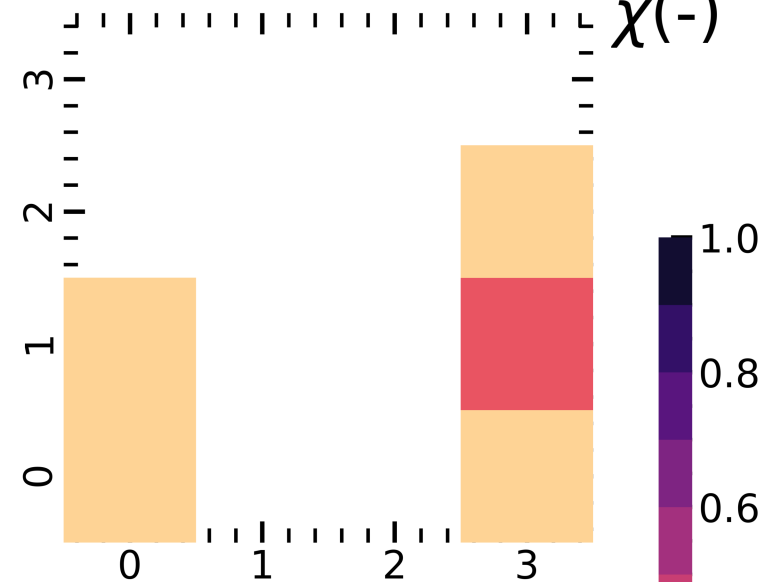 $\chi(-)$ 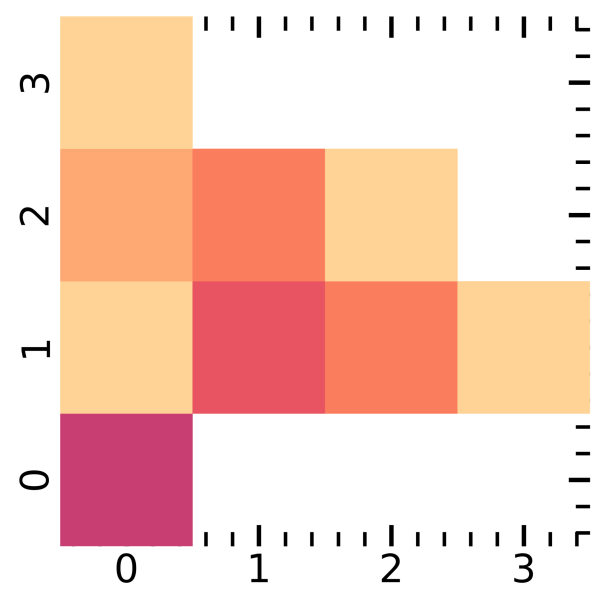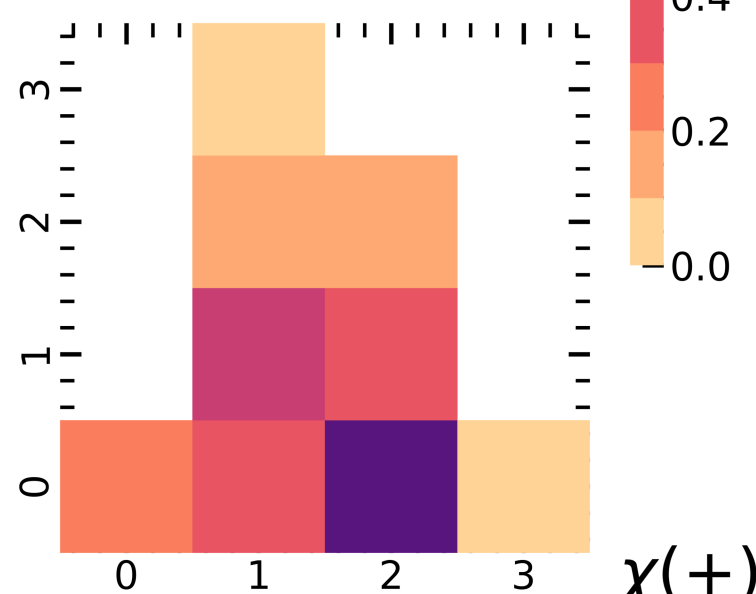 $\chi(+)$ 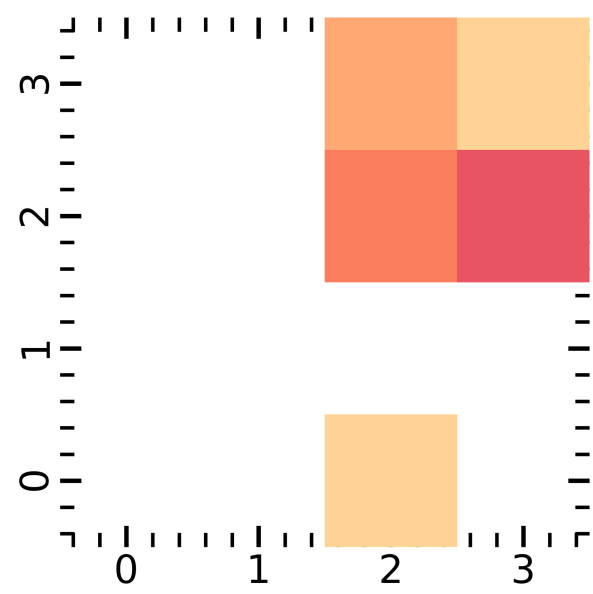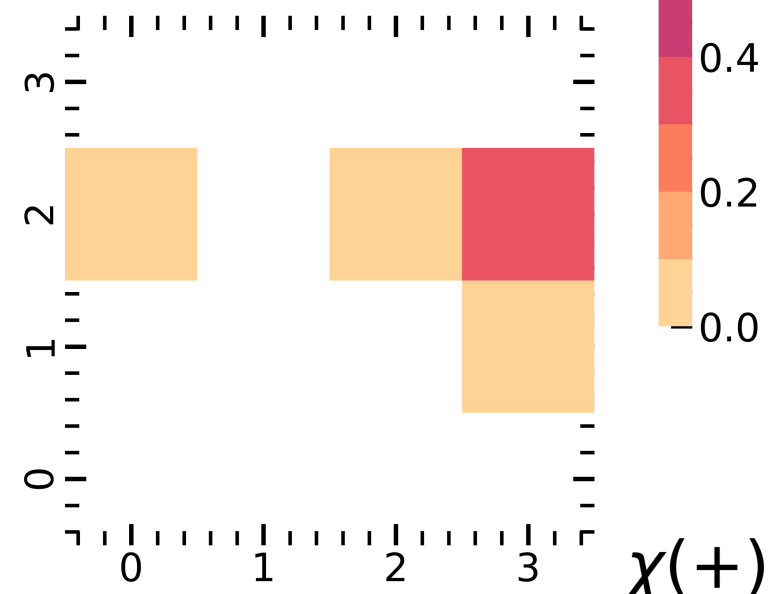 $\chi(+)$

Supplement: d2cp03497b1.zip [file d2cp03497b1.zip]

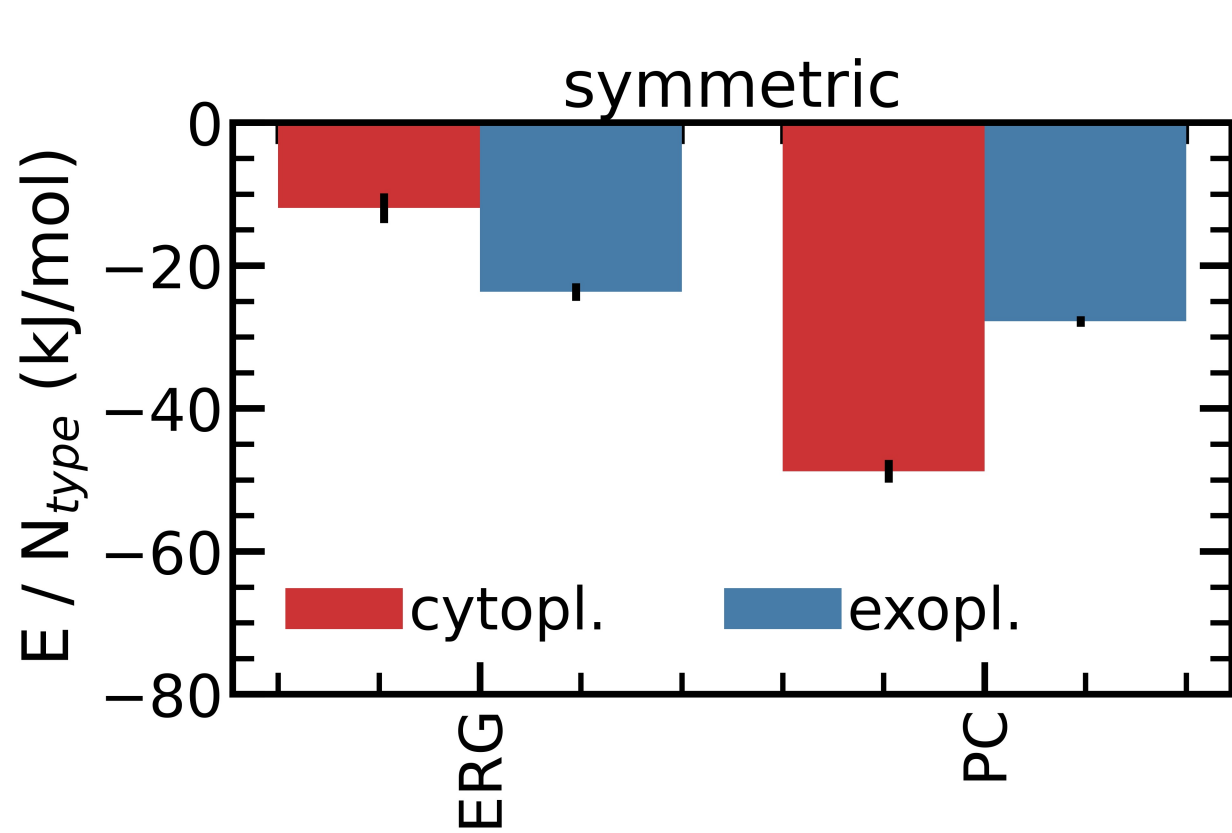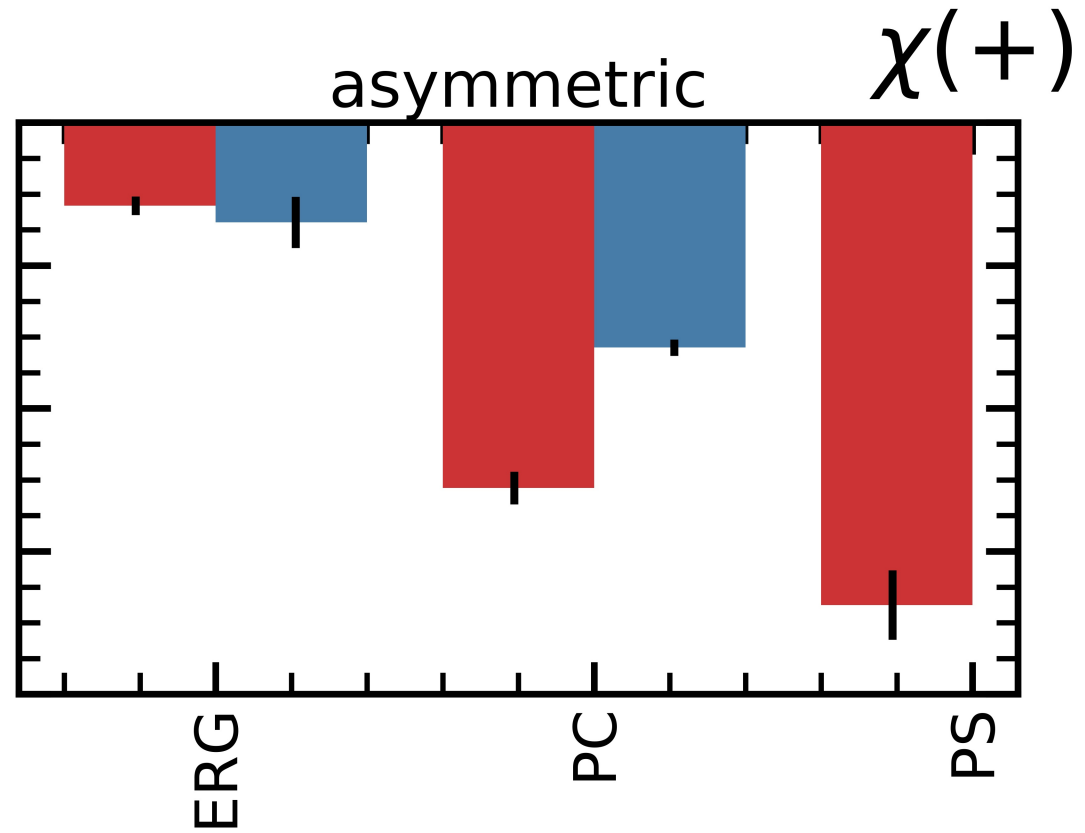

Supplement: d2cp03497b1.zip [file d2cp03497b1.zip]

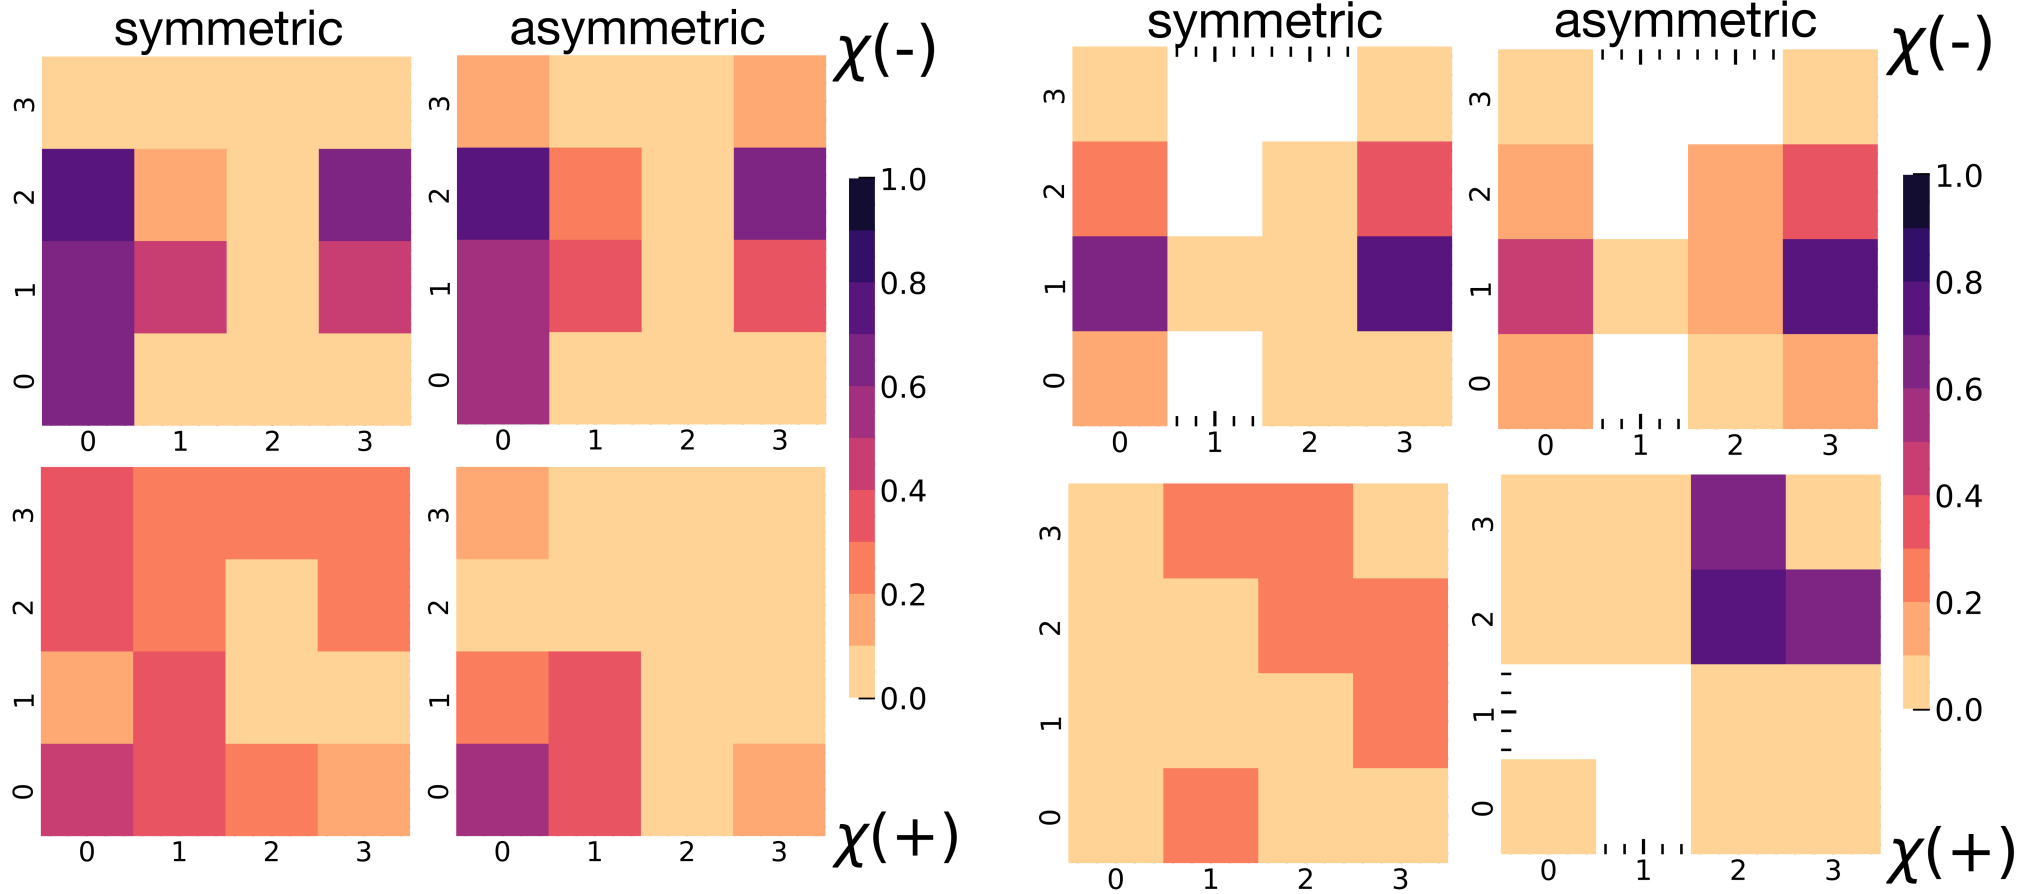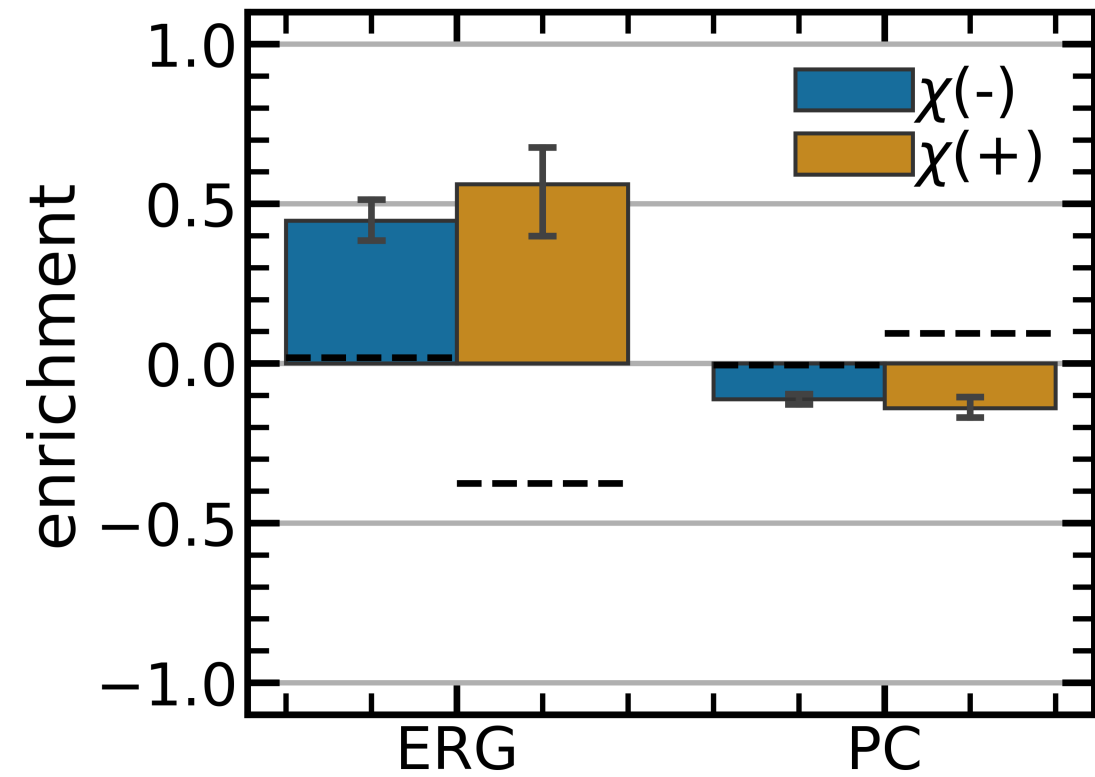

Supplement: d2cp03497b1.zip [file d2cp03497b1.zip]

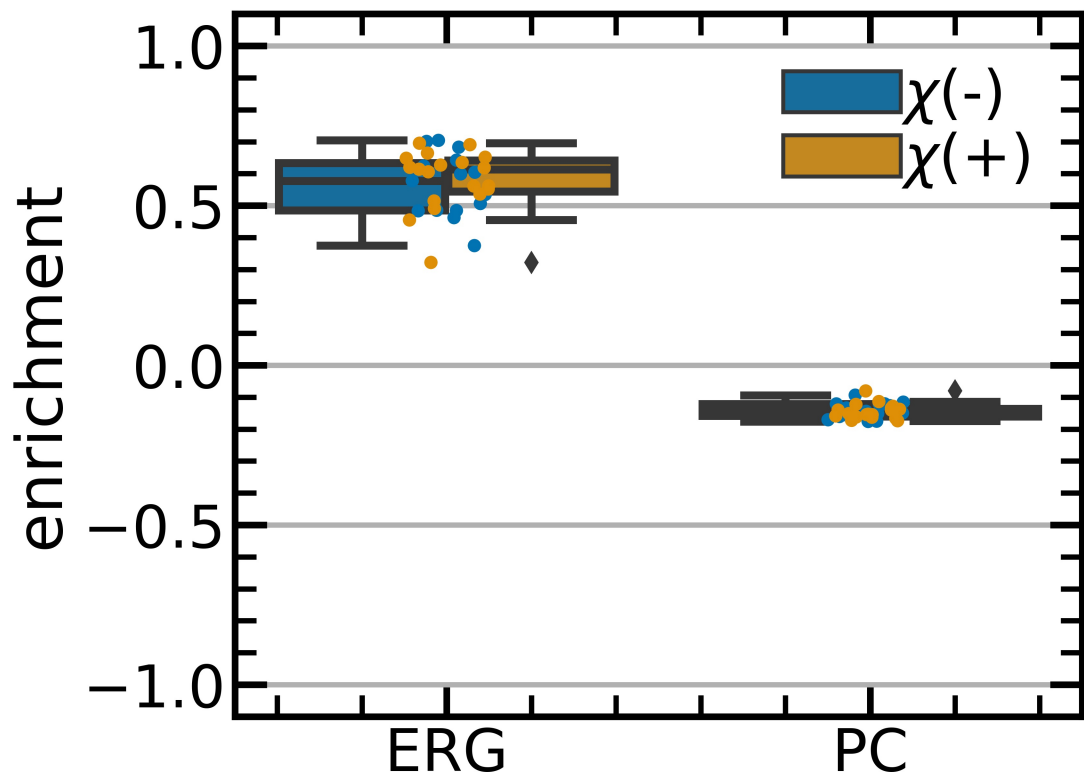

Supplement: d2cp03497b1.zip [file d2cp03497b1.zip]

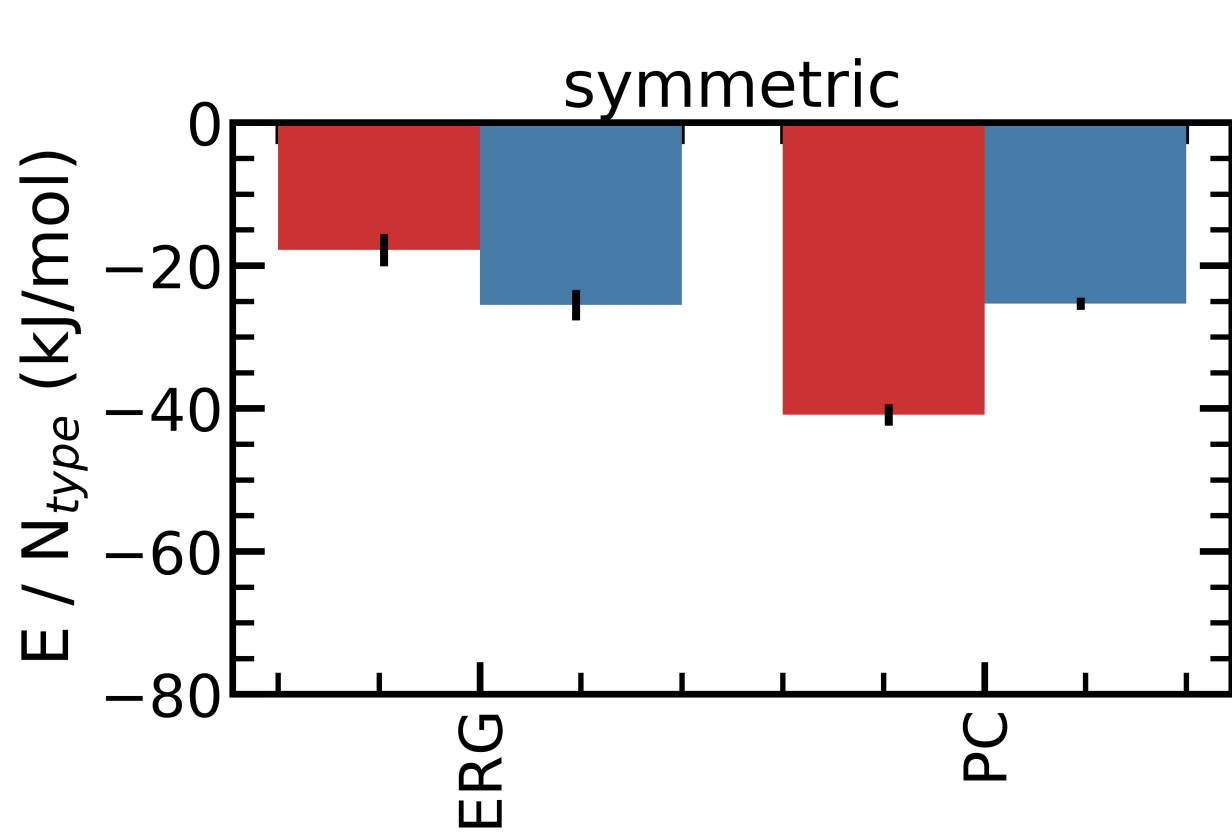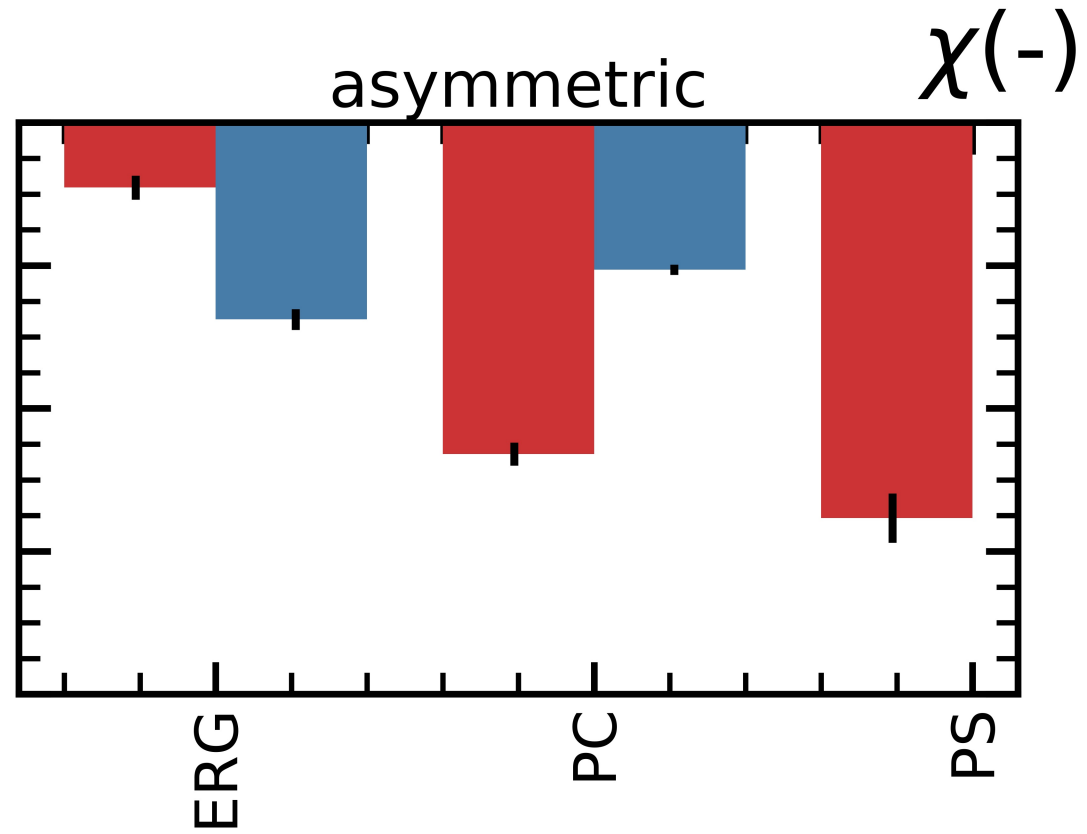

Supplement: d2cp03497b1.zip [file d2cp03497b1.zip]
